# Supplementary material for: Teaching hydrogeology: a review of current practice
Source: Copernicus journal article supplement (doi:10.5194/hess-16-2159-2012), 2012-07-18

## Supplementary information

**Figure S1. The compilation of all the topics from the 2005 survey of hydrogeology instructors.**

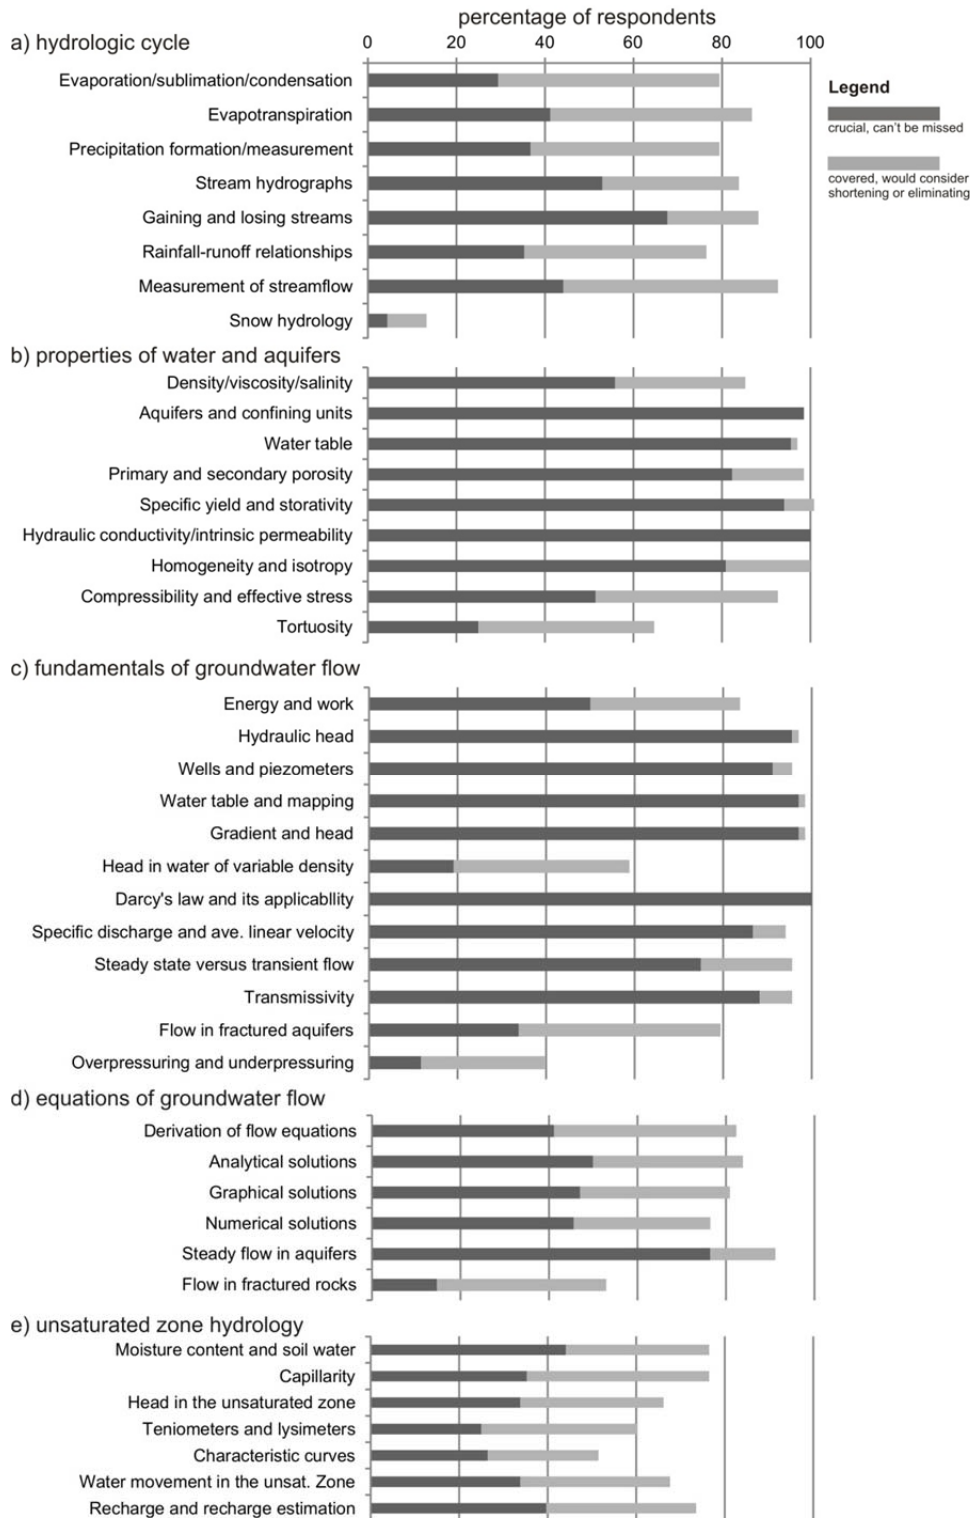

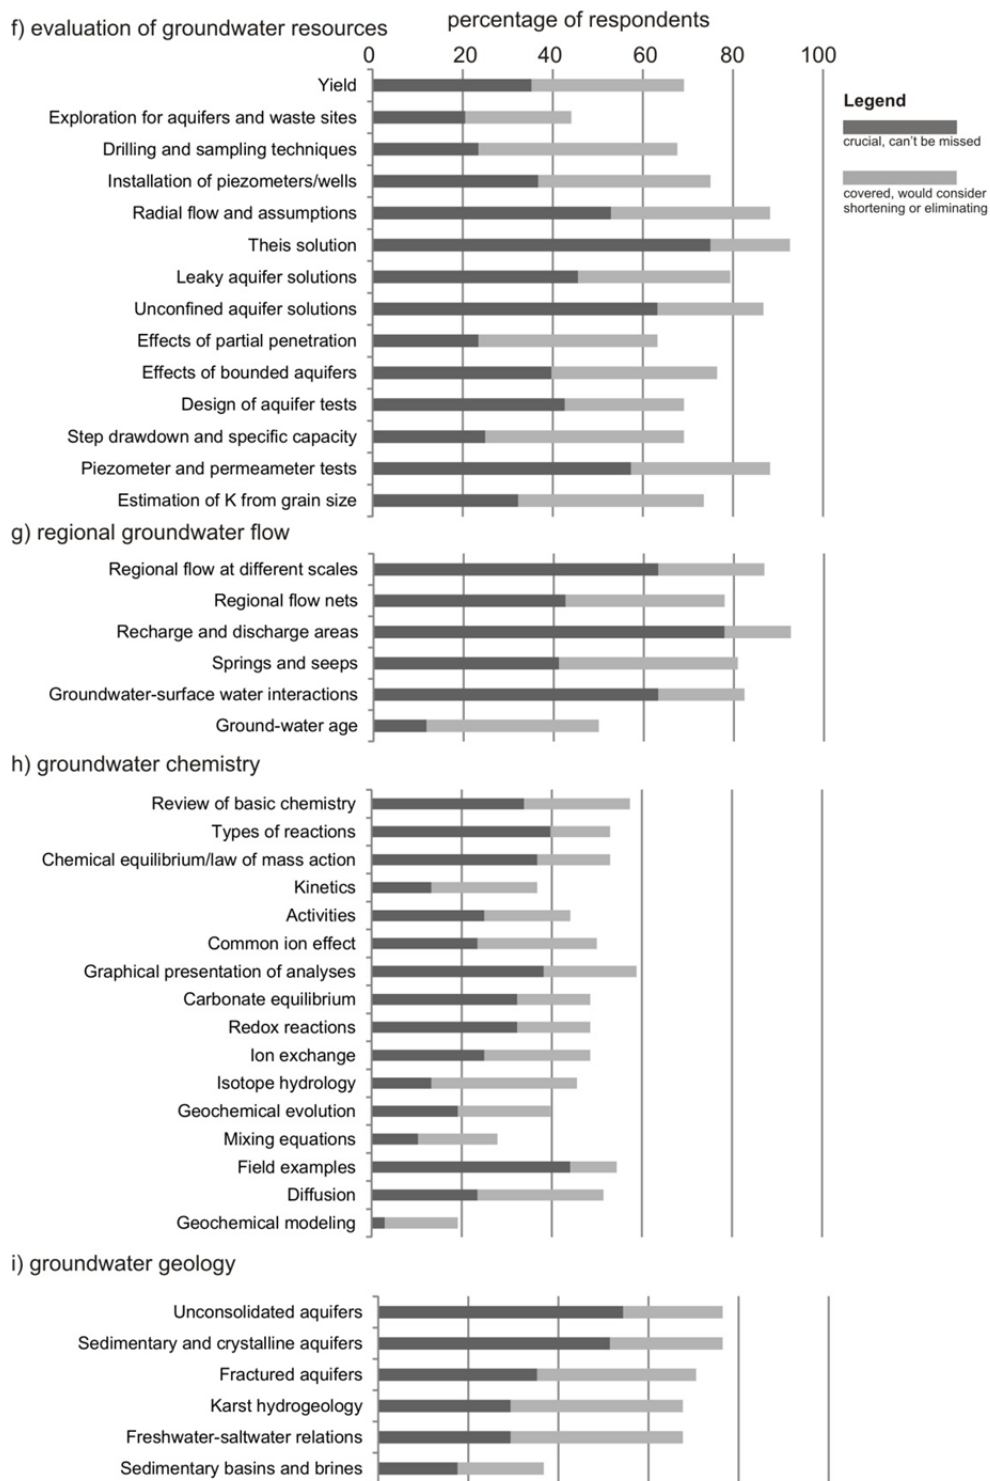

j) groundwater development and management

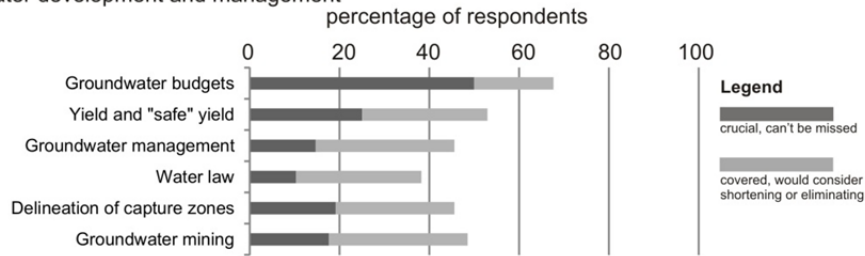

k) introduction to groundwater contamination

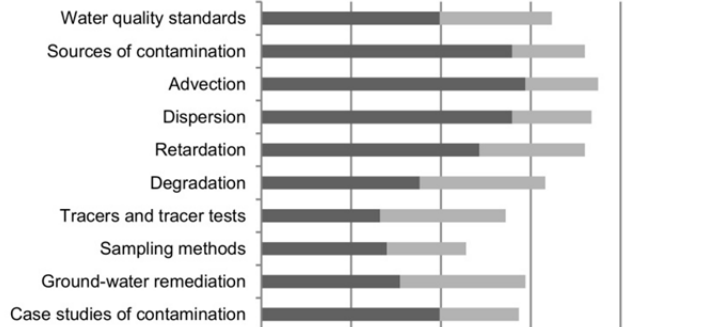

l) groundwater modeling

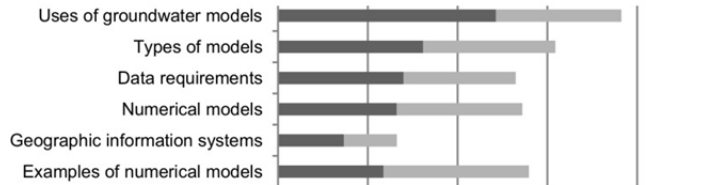

m) other topics

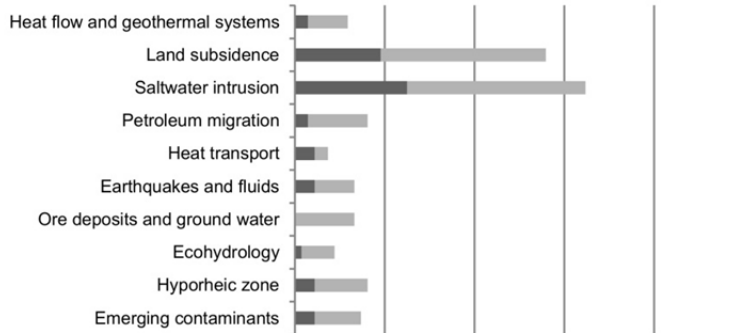

Supplement: Supplementary file 1 [file hess-16-2159-2012-supplement.pdf]
